# Supplementary material
Source: publisher figshare collection journal article supplement (https://sage.figshare.com/ndownloader/files/23612739)
Supplement: Supplementary file 1 [file 23612739]

## *Implicit transgender attitudes independently predict gender and transgender-related beliefs*

### Methodology File

#### Study 1 Instructions

Transgender and cisgender celebrities used as stimuli in the image-based transgender IAT

| Category                | Items                                                                              |
|-------------------------|------------------------------------------------------------------------------------|
| Cisgender celebrities   |  |
| Transgender celebrities |  |

Background information provided for transgender celebrity stimuli.

In this categorization task, you will sort images of both transgender and cisgender people. These are images of real people, some of whom you may know. To further familiarize yourself with these images, we provided a short description of each. This page contains the transgender images and the next page contains the cisgender images.

"Cisgender" refers to people who feel there is a match between the sex they were assigned at birth and the gender they feel themselves to be. "Transgender" refers to people who feel there is a mismatch between the sex they were assigned at birth and the gender they feel themselves to be.

| Transgender Person                                                                  | Name and Description                        |
|-------------------------------------------------------------------------------------|---------------------------------------------|
|  | Chaz Bono is a musician and actor.          |
|  | Chris Mosier is a triathlete.               |
|  | Laverne Cox is an actress.                  |
|  | Caitlyn Jenner is a television personality. |

Press the button below to learn about the cisgender images.

Continue

This page contains more information about the cisgender images.

| Cisgender Person                                                                  | Name and Description                  |
|-----------------------------------------------------------------------------------|---------------------------------------|
|  | Jon Favreau is an actor and director. |
|  | Tyler Clary is a swimmer.             |
|  | Meagan Good is an actress.            |
|  | Meryl Streep is an actress.           |

### Transgender Policy Support Items

Transgender policy-related items used in Studies 1-2, Studies S1-S2.

*All responses made on a 1=Strongly Disagree to 7=Strongly Agree scale. All items presented in a randomized order. Aggregate score calculated by averaging all responses.*

1. Transgender people should be able to use the bathroom of the gender they most closely identify with.
2. Transgender people should be able to easily obtain new official documents (driver's license, passports, etc.) after deciding to transition.
3. Transgender people working in offices with dress codes should be able to dress as the gender they most closely identify with.
4. Transgender people should be able to adopt children.
5. Health insurance should cover services needed by transgender people (hormones, surgery, etc.).

Outcome variables used in Studies 3a-3b.

**Policy Support**

*All responses made on a 1=Strongly Disagree to 7=Strongly Agree scale. Presentation of prompts was randomized, but order of items within prompts was fixed. Aggregate score calculated by averaging all responses. R = Reverse-scored item.*

Prompt 2: North Carolina's General Assembly recently passed a law that directed all public schools, college campuses, and government agencies to require that every multiple-occupancy bathroom or changing facility (e.g., school restroom, locker room, changing room, or shower room) be used only by people based on their biological sex (i.e., the physical condition of being male or female, which is stated on a person's birth certificate). This law requires that transgender people use the bathroom that corresponds to the gender on their birth certificate.

Prompt 1, Item 1: I support this law. *R*

Prompt 1, Item 2: Every state should adopt a law like this. *R*

Prompt 1, Item 3: It is wrong for people to use a bathroom that doesn't correspond with their biological sex. *R*

Prompt 1, Item 4: Transgender people should be allowed to use any bathroom they feel comfortable with.

Prompt 2: The University of North Carolina's LGBTQ Task Force supports, provides, and fully funds counseling services that help transgender people understand their gender-related experiences and feel secure in their gender identity.

Prompt 2, Item 1: I support the mission of this Task Force.

Prompt 2, Item 2: Every university should have a Task Force like this.

Prompt 2, Item 3: It is wrong for university counselors to provide services that help transgender people. *R*

Prompt 2, Item 4: Government agencies should fund counseling services that promote the transgender community.

Prompt 3: The United States Department of Defense (DoD) recently announced a new policy stating that transgender people are allowed to serve openly in the United States military, and cannot be discharged solely for identifying as transgender. Current military personnel may transition to their preferred gender with the support of a military medical provider. After transitioning, military personnel must use berthing, bathroom, and shower facilities that correspond with their preferred gender, and meet their preferred gender's physical fitness standards for the military.

Prompt 3, Item 1: It is wrong for transgender people to serve in the military. *R*

Prompt 3, Item 2: I support this policy.

Prompt 3, Item 3: Every country's military should have a policy like this.

Prompt 3, Item 4: Transgender people should be allowed to serve in the military as their preferred gender.

Prompt 4: Illinois recently banned 'trans panic' as a legal defense in assault, manslaughter, and murder cases. Under the old law, defendants could argue that they engaged in sexual relations while unaware of the victim's gender identity, and that this later discovery induced a state of temporary insanity that made them legally not accountable for their actions. Under the new ban, defendants are no longer allowed to use the discovery of a sexual partner's undisclosed gender identity as a legal defense.

Prompt 4, Item 1: I support this legal ban.

Prompt 4, Item 2: Every state should ban legal defenses like this.

Prompt 4, Item 3: It is wrong for transgender people to have sexual relations without disclosing their gender identity. *R*

Prompt 4, Item 4: People should be allowed to use the discovery of a sexual partner's undisclosed gender identity as a legal defense for assault, manslaughter, or murder. *R*

### **Transgender Relationship Interest**

*All responses made on a 0=No, 1= Yes scale. Items were presented in a randomized order.*

*Aggregate score calculated by summing all five responses.*

1. I am currently dating, or have dated a transgender person in the past.
2. I would be open to a romantic relationship with a transgender person.
3. I would go on a date with a transgender person.
4. I would be willing to engage in a sexual act with a transgender person.
5. I would be willing to marry a transgender person.

### **Transgender Contact**

*All responses made on a 0=No, 1= Yes scale. Items were presented in a randomized order.*

*Aggregate score calculated by summing all four responses.*

1. Do you have a family member who is transgender?
2. Do you have a friend who is transgender?
3. Do you have friendly interactions with transgender people on a regular basis?
4. Have you ever met a transgender person?

### **Transgender Attitude and Belief Scale (TABS; Kanamori et al., 2017)**

*All responses made on a 1=Strongly Disagree to 5=Strongly Agree scale. Items were presented in a randomized order. Aggregate score calculated by averaging all responses. R = Reverse-scored item.*

1. I would feel comfortable if my next-door neighbor was transgender.
2. I would find it highly objectionable to see a transgender person being teased or mistreated.
3. Whether a person is male or female depends strictly on their external sex-parts. *R*
4. Although most of humanity is male or female, there are also identities in between.
5. I would be comfortable being in a group of transgender individuals.
6. A person who is not sure about being male or female is mentally ill. *R*
7. I would be upset if someone I'd known for a long time revealed that they used to be another gender. *R*
8. If I knew someone was transgender, I would tend to avoid that person. *R*
9. If I knew someone was transgender, I would still be open to forming a friendship with that person.
10. I would be comfortable working for a company that welcomes transgender individuals.
11. All adults should identify as either male or female. *R*
12. Transgender individuals are valuable human beings regardless of how I feel about transgenderism.
13. A child born with ambiguous sex-parts should be assigned to be either male or female. *R*

14. A person does not have to be clearly male or female to be normal and healthy.
15. Humanity is only male or female; there is nothing in between. *R*
16. If a transgender person asked to be my housemate, I would want to decline. *R*
17. If you are born male, nothing you do will change that. *R*
18. I would feel comfortable having a transgender person into my home for a meal.
19. If my child brought home a transgender friend, I would be comfortable having that person into my home.
20. I would feel uncomfortable working closely with a transgender person in my workplace. *R*
21. Whether a person is male or female depends upon whether they feel male or female.
22. Transgender individuals should have the same access to housing as any other person
23. If a transgender person identifies as female, she should have the right to marry a man.
24. I would be uncomfortable if my boss was transgender. *R*
25. If someone I knew revealed to me that they were transgender, I would probably no longer be as close to that person. *R*
26. Transgender individuals should be treated with the same respect and dignity as any other person.
27. Transgender individuals are human beings with their own struggles, just like the rest of us.
28. I would feel uncomfortable finding out that I was alone with a transgender person. *R*
29. If I found out my doctor was transgender, I would want to seek another doctor. *R*



## **Transgender Misconceptions**

*All responses made on a 1=Strongly Disagree to 5=Strongly Agree scale. Items were presented in a randomized order. Aggregate score calculated by averaging all responses.*

1. Transgender people are trying to trick others.
2. Transgender people are trying to hide their gender from others for personal gain.
3. Transgender people are confused about their sexuality.
4. Transgender people are secretly lesbian, gay, or bisexual.
5. Transgender people are trapped in the wrong body.
6. All transgender people must medically transition through hormone therapy or surgery.
7. Transgender people are confused about gender.
8. Transgender people who identify as male or female are not “real” men or women.
9. Sex-reassignment surgery is what makes a person transgender.
10. Wanting to wear clothes typical of the opposite sex makes a person transgender.
11. Cross-dressers are transgender.
12. Drag queens (and drag kings) are transgender.
13. Transgender people are mentally ill.
14. Transgender people can be “fixed” through therapy.
15. Transgender people are unstable or flaky.
16. Transgender people have weak morals.
17. Transgender people are a danger to children.
18. Transgender people are hypersexual.
19. Most transgender people are sex workers.

20. Most transgender people are HIV+.

**Gender Essentialism (Hettinger, 2014)**

*All responses made on a 1=Strongly Disagree to 7=Strongly Agree scale. Items were presented in a randomized order. Aggregate score calculated by averaging all responses.*

1. Personality differences between men and women cannot be changed, because they are caused by biological factors such as genes and hormones.
2. Just knowing whether someone is male or female can tell you a lot about that person.
3. Masculinity and femininity are mutually exclusive categories, and each person either belongs to one or the other.
4. Under the surface, people are essentially very similar to others of their own gender.
5. Masculinity and femininity are concepts that have endured in basically the same form over time and across cultures.

**Ambivalent Sexism (Glick & Fiske, 1996)**

*All responses made on a 1=Strongly disagree to 6=Agree strongly scale. Items were presented in a randomized order. Aggregate score calculated by averaging all responses. B= Benevolent Sexism item, H= Hostile Sexism item. R = Reverse-scored item.*

1. No matter how accomplished he is, a man is not truly complete as a person unless he has the love of a woman. *B*
2. Many women are actually seeking special favors, such as hiring policies that favor them over men, under the guise of asking for "equality." *H*
3. In a disaster, women ought not necessarily to be rescued before men. *B,R*
4. Most women interpret innocent remarks or acts as being sexist. *H*
5. Women are too easily offended. *H*

6. People are often truly happy in life without being romantically involved with a member of the other sex. *B,R*
7. Feminists are not seeking for women to have more power than men. *H,R*
8. Many women have a quality of purity that few men possess. *B*
9. Women should be cherished and protected by men. *B*
10. Most women fail to appreciate fully all that men do for them. *H*
11. Women seek to gain power by getting control over men. *H*
12. Every man ought to have a woman whom he adores. *B*
13. Men are complete without women. *B,R*
14. Women exaggerate problems they have at work. *H*
15. Once a woman gets a man to commit to her, she usually tries to put him on a tight leash. *H*
16. When women lose to men in a fair competition, they typically complain about being discriminated against. *H*
17. A good woman should be set on a pedestal by her man. *B*
18. There are actually very few women who get a kick out of teasing men by seeming sexually available and then refusing male advances. *H,R*
19. Women, compared to men, tend to have a superior moral sensibility. *B*
20. Men should be willing to sacrifice their own well-being in order to provide financially for the women in their lives. *B*
21. Feminists are making entirely reasonable demands of men. *H,R*
22. Women, as compared to men, tend to have a more refined sense of culture and good taste. *B*
